# Supplementary material
Source: publisher figshare collection journal article supplement (https://karger.figshare.com/ndownloader/files/22744346)
Supplement: Supplementary file 1 [file 22744346]

**Supplementary Figure 1. Comparison of the expression levels of IL-1β and glucocorticoid receptors among glucocorticoid (GC)-resistant patients without a history of cytomegalovirus (CMV) infection and those with a history of CMV infection and GC-sensitive patients with ulcerative colitis.**

GC-Res UC, GC-resistant UC patients; GC-Sen, GC-sensitive group; GR; glucocorticoid receptor; #, *P* < 0.05; *NS*, not significant.
